# Supplementary material
Source: Research Square preprint supplement (doi:10.21203/rs.3.rs-9536048/v1)
Supplement: Supplementary file 2 [file dafd3d6b43fca0b7049857fe.docx]

**Supplementary File 1**

**Table S1. Full Data Extraction (N = 6)**

| **Author(s), Year** | **Country** | **Study Design / Source Type** | **Population / Participants** | **Disaster Type** | **DVI Phase(s) Addressed** | **Nursing Roles Identified** | **Competencies / Training Described** | **Key Findings Relevant to Nursing in DVI** |
| --- | --- | --- | --- | --- | --- | --- | --- | --- |
| Beauthier JP, De Valck E, Lefevre P, et al. (2009) | Belgium / Thailand | Operational case study | Belgian DVI team including a nurse, physician, and stress team | Natural disaster (2004 Indian Ocean Tsunami) | Phase 2 (Post-mortem) | Nurse listed as formal member of Belgian DVI team (Table 3: “1 paramedical member (nurse)”); nurse role was to attend to team members’ medical needs alongside a physician; nurse was integral member of the multidisciplinary team deployed to Khao Lak, Thailand | Not explicitly described for the nurse; implied competencies include providing medical support in austere field conditions, working within a multidisciplinary forensic team | Documented evidence of a nurse formally integrated into an international DVI team structure. Belgian DVI team was described as one of the only teams in the world to include a physician, a nurse, and a stress team as regular members. The nurse’s documented contributions involved medical support for team members (e.g., treating a heat stroke victim and a leg wound) |
| Lee T, Roy A, Power P, Sembajwe G, Dropkin J (2022) | USA (New York) | Observational case series | Nurses (RNs), nursing assistants (NAs), transporters, security personnel, EMS personnel, morgue attendants | Pandemic (COVID-19) | Phase 2 (Post-mortem – mortuary/body collection point operations) | Nurses (RNs) and nursing assistants (NAs) placed decedents into body bags on medical units; transferred decedents onto transport stretchers; transported decedents to the morgue. Security personnel and morgue attendants performed subsequent handling in morgues and BCPs | Staff were unaccustomed to physical and mental stressors of decedent handling; competency gaps identified in ergonomic safety, infection control, and psychological preparedness. Workers’ compensation data: NAs had 22 claims (35.5%), RNs had 5 claims (8%) | Direct evidence of nursing involvement in mass fatality decedent handling operations. Nurses performed initial body bagging and transport on medical units. Those assuming new decedent handling roles were unaccustomed to the physical and mental stressors. Over 4,000 lost workdays due to decedent handling injuries across the health system |
| International Council of Nurses (2022) | International | Grey literature: Competency framework | All nursing professionals involved in disaster response | All disaster types | Not phase-specific (does NOT address DVI) | 8 domains of disaster nursing competencies: preparation and planning, communication, incident management systems, safety and security, assessment, intervention, recovery, and law and ethics | Comprehensive disaster nursing competency framework. Does NOT specifically address DVI, forensic nursing, mass fatality management, or dead body management | Critical gap: the primary international disaster nursing competency framework does not include DVI-specific competencies, mass fatality management, or dead body handling |
| International Nursing Coalition for Mass Casualty Education (2003) | USA | Grey literature: Consensus-based competency framework | Registered nurses responding to mass casualty incidents | Mass casualty incidents (all types) | Not phase-specific (does NOT address DVI/mortuary) | 64 competencies across critical thinking, assessment, technical skills, communication. Does NOT address DVI, mortuary operations, or body identification | 64 consensus-based competencies for MCI response. DVI/mass fatality competencies absent from framework | The US national nursing MCI competency framework does not include DVI, mortuary operations, or body identification. Described 2.7 million US RNs as a tremendous untapped resource |
| International Association of Forensic Nurses & American Nurses Association (2017) | USA (international scope) | Grey literature: Professional standards document | Forensic nurses (all subspecialties) | Applicable to disaster contexts | Phase 2 (Post-mortem – death investigation), Phase 3 (Ante-mortem – evidence from living) | 19 standards with competencies covering medicolegal death investigation, evidence collection/preservation, disaster response, global contexts | Medicolegal death investigation, forensic evidence collection and preservation, chain of custody, documentation, family advocacy, interdisciplinary collaboration | Establishes professional scope and standards for forensic nursing including disaster response. Competencies are directly transferable to DVI contexts though DVI is not explicitly named |
| Williams J, Williams D (2011) | USA (international applicability) | Grey literature: Textbook chapter in professional reference text | Forensic nurses responding to mass casualty and mass fatality events; forensic nurse specialists; advanced practice forensic nurses; DMORT team members; FACT team members | All disaster types – natural (tsunamis, hurricanes, earthquakes, tornadoes, wildfires, floods), man-made (terrorism, bombings, aviation accidents, building collapses), and CBRNE incidents | All four INTERPOL DVI phases: Phase 1 (Scene), Phase 2 (Post-mortem), Phase 3 (Ante-mortem), Phase 4 (Reconciliation) | (1) Identifying the dead – explicitly stated core role; (2) DMORT team membership (morgue operations, victim identification, mortuary services, search/recovery, AM/PM data collection, family assistance centers); (3) FACT team membership under Aviation Disaster Family Assistance Act 1996; (4) Mass casualty triage; (5) Evidence collection and chain of custody; (6) Forensic documentation (photography, diagrams); (7) Death notification and family viewing support; (8) CISM debriefing; (9) Autopsy assistance; (10) Fingerprinting (with specialized training); (11) Collection of DNA reference swabs from next of kin; (12) Antemortem data collection via 8-page Victim Identification Profile (VIP); (13) Coordination with ME/coroner, FBI, NTSB, ATF | Core emergency and disaster preparedness competencies (citing INCME 2003); clinical forensic nursing expertise; cross-training for DMORT role flexibility; physical/nonphysical evidence collection and chain of custody; forensic wound identification and documentation; CISM debriefing training; triage competency; mass fatality victim identification methodology; antemortem data collection via VIP interview; DNA reference sample collection; multidisciplinary team coordination; HIPAA compliance during declared emergencies; blast injury/burn/blunt force/radiation/toxic inhalation assessment | The most comprehensive articulation of forensic nursing roles in DVI identified in the literature. Forensic nurses are formal members of DMORT teams alongside forensic pathologists, anthropologists, odontologists, and fingerprint experts – directly participating in all phases of DVI. Forensic nurses are formal members of the FACT team mandated by the Aviation Disaster Family Assistance Act of 1996, collecting antemortem data via the 8-page VIP. Describes specific historical mass fatality deployments: 9/11 WTC, Hurricane Katrina, Hardin Cemetery flood (1993), Noble Georgia incident (2002), 2003 Station Nightclub Fire, 2004 SE Asia tsunami, Hurricane Andrew. References the National Disaster Medical System (NDMS) inclusion of forensic nurses and describes four WHO Panel 2.16 MFI characteristics. Emphasizes forensic nurse competency in discovering, identifying, and collecting physical and nonphysical evidence during disasters |

*Abbreviations: ANA = American Nurses Association; BCP = Body Collection Point; CBRNE = Chemical, Biological, Radiological, Nuclear, and Explosive; CISM = Critical Incident Stress Management; DMORT = Disaster Mortuary Operational Response Team; DVI = Disaster Victim Identification; FACT = Family Assistance Care Team; IAFN = International Association of Forensic Nurses; ICN = International Council of Nurses; INCMCE = International Nursing Coalition for Mass Casualty Education; MCI = Mass Casualty Incident; MFI = Mass Fatality Incident; NA = Nursing Assistant; NDMS = National Disaster Medical System; PMCT = Postmortem Computed Tomography; PMMR = Postmortem Magnetic Resonance; PMR = Postmortem Radiology; RN = Registered Nurse; VIP = Victim Identification Profile.*
