# Supplementary material
Source: Research Square preprint supplement (doi:10.21203/rs.3.rs-9536048/v1)
Supplement: Supplementary file 3 [file ecb4d53492a888fe88cc7ce9.docx]

**Supplementary File 2**

**Full Search Strategies by Database**

*Search conducted: January 2026*

*No date or language limiters applied*

**Title**: Nursing Roles and Competencies in Disaster Victim Identification: A Scoping Review

**Reseach Question**: What evidence is available on the roles and competencies of nursing professionals (Population) in disaster victim identification (Concept) across all disaster settings worldwide (Context)?

**MEDLINE (via PubMed)**

| **Search ID Number** | **Query** | **Results** |
| --- | --- | --- |
| **#1** | "nurses"[MeSH Terms] OR "nurs*"[All Fields] OR "forensic nurs*"[All Fields] OR "disaster nurs*"[All Fields] OR "emergency nurs*"[All Fields] OR "public health nurs*"[All Fields] OR "community health nurs*"[All Fields] OR "nurse practitioner*"[All Fields] OR "clinical nurse specialist*"[All Fields] OR "nursing assistant*"[All Fields] OR "nurse aide*"[All Fields] OR "registered nurse*"[All Fields] | 1,316,714 |
| **#2** | "disaster victim identification"[All Fields] OR "DVI"[All Fields] OR "mass fatality"[All Fields] OR "mass fatalities"[All Fields] OR "mass fatality management"[All Fields] OR "dead bod*"[All Fields] OR "dead body management"[All Fields] OR "human remains"[All Fields] OR "human remains identification"[All Fields] OR "body recovery"[All Fields] OR "body identification"[All Fields] OR "morgue"[MeSH Terms] OR "morgue"[All Fields] OR "mortuary"[All Fields] OR "mortuaries"[All Fields] OR "morgue"[MeSH Terms] OR "morgue"[All Fields] OR "mortuary"[All Fields] OR "mortuaries"[All Fields] OR "mortuary operations"[All Fields] OR "temporary mortuary"[All Fields] OR "morgue*"[All Fields] OR "forensic identification"[All Fields] OR "forensic examination"[All Fields] OR "postmortem examination"[All Fields] OR "post-mortem examination"[All Fields] OR "ante-mortem"[All Fields] OR "antemortem"[All Fields] OR "post-mortem"[All Fields] OR "autopsy"[MeSH Terms] OR "autopsy"[All Fields] OR "postmortem"[All Fields] OR "postmortems"[All Fields] OR "chain of custody"[All Fields] OR "evidence collection"[All Fields] OR "evidence preservation"[All Fields] OR "forensic evidence"[All Fields] OR "victim identification"[All Fields] OR "decedent handling"[All Fields] OR "body handling"[All Fields] OR "body management"[All Fields] OR "death investigation"[All Fields] OR "death certification"[All Fields] OR "burial"[MeSH Terms] OR "burial"[All Fields] OR "burials"[All Fields] OR "identify* remains"[All Fields] | 188,204 |
| **#3** | **#1 AND #2**  ("nurses"[MeSH Terms] OR "nurs*"[All Fields] OR "forensic nurs*"[All Fields] OR "disaster nurs*"[All Fields] OR "emergency nurs*"[All Fields] OR "public health nurs*"[All Fields] OR "community health nurs*"[All Fields] OR "nurse practitioner*"[All Fields] OR "clinical nurse specialist*"[All Fields] OR "nursing assistant*"[All Fields] OR "nurse aide*"[All Fields] OR "registered nurse*"[All Fields]) AND ("disaster victim identification"[All Fields] OR "DVI"[All Fields] OR "mass fatality"[All Fields] OR "mass fatalities"[All Fields] OR "mass fatality management"[All Fields] OR "dead bod*"[All Fields] OR "dead body management"[All Fields] OR "human remains"[All Fields] OR "human remains identification"[All Fields] OR "body recovery"[All Fields] OR "body identification"[All Fields] OR ("morgue"[MeSH Terms] OR "morgue"[All Fields] OR "mortuary"[All Fields] OR "mortuaries"[All Fields]) OR ("morgue"[MeSH Terms] OR "morgue"[All Fields] OR "mortuary"[All Fields] OR "mortuaries"[All Fields]) OR "mortuary operations"[All Fields] OR "temporary mortuary"[All Fields] OR "morgue*"[All Fields] OR "forensic identification"[All Fields] OR "forensic examination"[All Fields] OR "postmortem examination"[All Fields] OR "post-mortem examination"[All Fields] OR "ante-mortem"[All Fields] OR "antemortem"[All Fields] OR "post-mortem"[All Fields] OR ("autopsy"[MeSH Terms] OR "autopsy"[All Fields] OR "postmortem"[All Fields] OR "postmortems"[All Fields]) OR "chain of custody"[All Fields] OR "evidence collection"[All Fields] OR "evidence preservation"[All Fields] OR "forensic evidence"[All Fields] OR "victim identification"[All Fields] OR "decedent handling"[All Fields] OR "body handling"[All Fields] OR "body management"[All Fields] OR "death investigation"[All Fields] OR "death certification"[All Fields] OR ("burial"[MeSH Terms] OR "burial"[All Fields] OR "burials"[All Fields]) OR "identify* remains"[All Fields]) | 1,778 |

**Scopus**

| **Search ID Number** | **Query** | **Results** |
| --- | --- | --- |
| **#1** | ( TITLE-ABS-KEY ( nurs* ) OR TITLE-ABS-KEY ( "forensic nurs*" ) OR TITLE-ABS-KEY ( "disaster nurs*" ) OR TITLE-ABS-KEY ( "emergency nurs*" ) OR TITLE-ABS-KEY ( "public health nurs*" ) OR TITLE-ABS-KEY ( "community health nurs*" ) OR TITLE-ABS-KEY ( "nurse practitioner*" ) OR TITLE-ABS-KEY ( "clinical nurse specialist*" ) OR TITLE-ABS-KEY ( "nursing assistant*" ) OR TITLE-ABS-KEY ( "nurse aide*" ) OR TITLE-ABS-KEY ( "registered nurse*" ) ) | 1,109,954 |
| **#2** | ( TITLE-ABS-KEY ( "disaster victim identification" ) OR TITLE-ABS-KEY ( dvi ) OR TITLE-ABS-KEY ( "mass fatality" ) OR TITLE-ABS-KEY ( "mass fatalities" ) OR TITLE-ABS-KEY ( "forensic identification" ) OR TITLE-ABS-KEY ( "forensic examination" ) OR TITLE-ABS-KEY ( "postmortem examination" ) OR TITLE-ABS-KEY ( "post-mortem examination" ) OR TITLE-ABS-KEY ( "evidence collection" ) OR TITLE-ABS-KEY ( "evidence preservation" ) OR TITLE-ABS-KEY ( "victim identification" ) ) | 34,542 |
| **#3** | **#1 AND #2**  ( ( TITLE-ABS-KEY ( nurs* ) OR TITLE-ABS-KEY ( "forensic nurs*" ) OR TITLE-ABS-KEY ( "disaster nurs*" ) OR TITLE-ABS-KEY ( "emergency nurs*" ) OR TITLE-ABS-KEY ( "public health nurs*" ) OR TITLE-ABS-KEY ( "community health nurs*" ) OR TITLE-ABS-KEY ( "nurse practitioner*" ) OR TITLE-ABS-KEY ( "clinical nurse specialist*" ) OR TITLE-ABS-KEY ( "nursing assistant*" ) OR TITLE-ABS-KEY ( "nurse aide*" ) OR TITLE-ABS-KEY ( "registered nurse*" ) ) ) AND ( ( TITLE-ABS-KEY ( "disaster victim identification" ) OR TITLE-ABS-KEY ( dvi ) OR TITLE-ABS-KEY ( "mass fatality" ) OR TITLE-ABS-KEY ( "mass fatalities" ) OR TITLE-ABS-KEY ( "forensic identification" ) OR TITLE-ABS-KEY ( "forensic examination" ) OR TITLE-ABS-KEY ( "postmortem examination" ) OR TITLE-ABS-KEY ( "post-mortem examination" ) OR TITLE-ABS-KEY ( "evidence collection" ) OR TITLE-ABS-KEY ( "evidence preservation" ) OR TITLE-ABS-KEY ( "victim identification" ) ) ) | 357 |

**Web of Science**

| **Search ID Number** | **Query** | **Results** |
| --- | --- | --- |
| **#1** | ((((((((((TI=(nurs*)) OR TI=("forensic nurs*")) OR TI=("disaster nurs*")) OR TI=("emergency nurs*")) OR TI=("public health nurs*")) OR TI=("community health nurs*")) OR TI=("nurse practitioner*")) OR TI=("clinical nurse specialist*")) OR TI=("nursing assistant*" )) OR TI=("nurse aide*" )) OR TI=("registered nurse*") | 241,753 |
| **#2** | ((((((((((((ALL=("disaster victim identification" )) OR ALL=(DVI)) OR ALL=("mass fatality" )) OR ALL=("mass fatalities" )) OR ALL=("dead body management")) OR ALL=("body identification")) OR ALL=("forensic identification")) OR ALL=("forensic examination")) OR ALL=("postmortem examination" )) OR ALL=("evidence collection")) OR ALL=("evidence preservation" )) OR ALL=("victim identification")) OR ALL=("death investigation") | 14,037 |
| **#3** | **#1 AND #2**  <https://www.webofscience.com/wos/woscc/summary/d0df8713-257d-491f-989a-15ab16d0244d-01acf1c219/relevance/1> | 73 |
